# Supplementary material for: Glycolysis-related gene expression profiling serves as a novel prognosis risk predictor for human hepatocellular carcinoma
Source: PubMed Central journal article supplement (PMC8460833; doi:10.1038/s41598-021-98381-2), 2021-09-23
Supplement: 41598_2021_98381_MOESM1_ESM.pdf [file 41598_2021_98381_MOESM1_ESM.pdf]

**Glycolysis-related gene expression profiling serves as a novel prognosis risk  
predictor for human hepatocellular carcinoma**

**Lingyu Zhang<sup>1,\*</sup>, Yu Li<sup>2,\*</sup>, Yibei Dai<sup>1</sup>, Xuchu Wang<sup>1</sup>, Ying Cao<sup>1</sup>, Weiwei Liu<sup>1</sup>, Zhihua Tao<sup>1</sup>**

<sup>1</sup>Department of Laboratory Medicine, The Second Affiliated Hospital of Zhejiang University  
School of Medicine, Hangzhou, 310009, China

<sup>2</sup>Department of Biochemistry and Molecular Biology, Bengbu Medical College, Anhui 233030,  
China

\*These authors contributed equally to the work.

*Correspondence to:* Zhihua Tao, Department of Laboratory Medicine, The Second Affiliated  
Hospital of Zhejiang University School of Medicine, 88 Jiefang Road, Hangzhou, Zhejiang  
310009, P.R. China, Email: zrtzh@zju.edu.cn; Weiwei Liu, Department of Laboratory Medicine,  
The Second Affiliated Hospital of Zhejiang University School of Medicine, 88 Jiefang Road,  
Hangzhou, Zhejiang 310009, P.R. China, Email: liuweiwei@zju.edu.cn.

**Table S1.** Core genes of 6 solid tumors.

| Cancer Type | Sample numbers           | Genes                                                                                                                                                                                                                                                                                                                                                                                                                                                                                                                                                                                                                                                                                                                                                                                                                                                                                                                                                                                                                                                                                                                    | Core Enrichment |
|-------------|--------------------------|--------------------------------------------------------------------------------------------------------------------------------------------------------------------------------------------------------------------------------------------------------------------------------------------------------------------------------------------------------------------------------------------------------------------------------------------------------------------------------------------------------------------------------------------------------------------------------------------------------------------------------------------------------------------------------------------------------------------------------------------------------------------------------------------------------------------------------------------------------------------------------------------------------------------------------------------------------------------------------------------------------------------------------------------------------------------------------------------------------------------------|-----------------|
| BLCA        | Normal 19<br>Tumor 414   | <p>AAAS, ACSS2, ADPGK, AGRN, AKR1A1, ALDOA, ALDOC, ALG1, ANKZF1, ARTN, AURKA, B3GALT6, B3GAT3, B3GNT3, B4GALT2, B4GALT7, BPGM, BPNT1, CASP6, CDK1, CENPA, CHPF, CHPF2, CHST1, CHST12, CHST6, CLDN9, CLN6, COG2, COPB2, DDIT4, DEPD C1, DHTKD1, EFNA3, EIF6, ENO1, ENO2, ERO1A, EXT1, EXT2, FH, FKBP4, G6PC, GALE, GALK1, GALM, GAPDH, GAPDHS, GFPT1, GLCE, GMPPA, GMPPB, GPI, GUSB, GYS1, HAX1, HK1, HK2, HK3, HMMR, HS2ST1, HS6ST2, HSPA5, IDH2, IDH3B, IDH3G, IDUA, IGFBP3, IL13RA1, KDELR3, KIF20A, LDHA, LDHAL6A, LDHC, MDH2, MED24, MIF, MIOX, MIR210, NANP, NASP, NDC1, NDUFV3, NOL3, NSDHL, NUP107, NUP155, NUP160, NUP188, NUP205, NUP210, NUP35, NUP37, NUP42, NUP43, NUP50, NUP58, NUP62, NUP85, NUP93, OGT, P4HA1, PAXIP1, PC, PCK2, PDHA1, PDK3, PFKFB1, PFKFB2, PFKFB4, PFKL, PGK1, PGLS, PGM2, PGP, PHKA2, PKM, PLOD1, PMM2, POLR3K, POM121C, PPFIA4, PPIA, PPP2R1A, PPP2R1B, PPP2R5D, PRKAG1, PSMC4, PYGM, RAE1, RARS1, RBCK1, RPE, SDHB, SDHC, SEC13, SEH1L, SLC16A3, SLC25A10, SLC25A13, SLC37A4, SOD1, SOX9, SPAG4, SRD5A3, STC2, STMN1, TGFA, TGFB1, TP53, TPI1, TPR, TREH, TSTA3, VCAN, XYLT2</p>    | YES             |
| BRAC        | Normal 113<br>Tumor 1103 | <p>AAAS, ACSS2, ADH1A, ADH1B, ADH1C, ADH4, ADH5, ADH6, ADPGK, AGRN, AKR1A1, ALDH1A3, ALDH2, ALDH3A2, ALDH7A1, ALDOA, ALDOC, ALG1, ARTN, AURKA, B3GALT6, B3GAT3, B4GALT1, B4GALT2, B4GALT4, B4GALT7, BIK, BPGM, BPNT1, CACNA1H, CASP6, CBFA2T3, CDK1, CENPA, CHPF, CHPF2, CHST6, CLDN3, CLN6, COG2, COL5A1, COPB2, CXCR4, DEPDC1, DHTKD1, EFNA3, EGLN3, EIF6, ELF3, ENO1, ENO2, ERO1A, FAM162A, FBP1, FH, FKBP4, FUT8, GALE, GALK1, GAPDH, GMPPA, GMPPB, GNPDA1, GOT2, GPC1, GPC4, GPI, HAX1, HK1, HMMR, HSPA5, IDH2, IDH3G, IDUA, IER3, ISG20, JMJD8, KDELR3, KIF20A, LDHA, LDHB, MDH2, ME2, MED24, MIF, MIOX, MIR210, NASP, NDC1, NSDHL, NUP107, NUP133, NUP155, NUP188, NUP205, NUP210, NUP37, NUP43, NUP50, NUP58, NUP62, NUP85, NUP93, OGDHL, P4HA1, P4HA2, PAXIP1, PCK1, PCK2, PDK3, PFKFB1, PFKFB3, PFKFB4, PFKL, PFKP, PGAM1, PGK1, PGK2, PGLS, PGM1, PGM2, PGM2L1, PGP, PKM, PLOD1, PMM2, POLR3K, PPIA, PPP2CA, PPP2CB, PPP2R1A, PPP2R1B, PPP2R5D, PRKAG1, PRPS1, PSMC4, SOX1, RAE1, RARS1, RBCK1, RPE, SAP30, SDC1, SDHC, SEC13, SEH1L, SLC16A3, SLC25A10, SLC25A13, SLC35A3, SLC37A4, SOD1, SPAG4, SRD5A3,</p> | YES             |

|             |                                |                                                                                                                                                                                                                                                                                                                                                                                                                                                                                                                                                                                                                                                                                                                                                                                                                                                                                                                                                                                                                                                                                                                                                                                                                             |            |
|-------------|--------------------------------|-----------------------------------------------------------------------------------------------------------------------------------------------------------------------------------------------------------------------------------------------------------------------------------------------------------------------------------------------------------------------------------------------------------------------------------------------------------------------------------------------------------------------------------------------------------------------------------------------------------------------------------------------------------------------------------------------------------------------------------------------------------------------------------------------------------------------------------------------------------------------------------------------------------------------------------------------------------------------------------------------------------------------------------------------------------------------------------------------------------------------------------------------------------------------------------------------------------------------------|------------|
|             |                                | STMN1, TALDO1, TFF3, TIGAR, TP53, TPBG, TPI1, TPR, TSTA3, TXN, VCAN, VEGFA, XYLT2, ZBTB7A                                                                                                                                                                                                                                                                                                                                                                                                                                                                                                                                                                                                                                                                                                                                                                                                                                                                                                                                                                                                                                                                                                                                   |            |
| <b>HNSC</b> | <b>Normal 44<br/>Tumor 502</b> | AAAS, ABCB6, AC016586.1, ACSS2, ACTN3, ADH1A, ADH1B, ADH4, ADH6, ADH7, ADPGK, AGRN, AKR1A1, ALDH1A3, ALDH2, ALDH3A1, ALDH3A2, ALDH3B1, ALDH3B2, ALDH7A1, ALDH9A1, ALDOA, ALDOC, ALG1, ANKZF1, ARPP19, ARTN, AURKA, B3GALT6, B3GAT3, B4GALT1, B4GALT2, B4GALT7, BPGM, CACNA1H, CASP6, CD44, CDK1, CENPA, CHPF, CHPF2, CHST1, CHST12, CHST2, CLN6, COL5A1, COPB2, CXCR4, DDIT4, DEPDC1, DLAT, DLGFR, EGLN3, ENO1, ENO2, ENO3, EXT1, EXT2, FBP2, FKBP4, G6PC2, G6PD, GALK2, GAPDH, GCK, GMPPA, GNPDA1, GPC1, GPI, GPR87, HIF1A, HK1, HK2, HK3, HKDC1, HMMR, HS2ST1, HSPA5, IGFBP3, INS, ISG20, KDELR3, KIF20A, LDHA, MET, MIF, MIOX, NANP, NASP, NDC1, NT5E, NUP107, NUP133, NUP153, NUP155, NUP160, NUP188, NUP205, NUP210, NUP214, NUP35, NUP37, NUP42, NUP43, NUP50, NUP54, NUP58, NUP62, NUP85, NUP93, OGT, P4HA1, P4HA2, PC, PDHA1, PDHB, PDK3, PFKFB1, PFKFB3, PFKFB4, PFKL, PFKM, PFKP, PGAM1, PGK1, PGM1, PGM2, PGP, PKLR, PKM, PLOD1, PLOD2, POLR3K, POM121, POM121C, PPIA, PPP2CA, PPP2CB, PPP2R1A, PPP2R5D, PRKACA, PRKACB, PRPS1, PRXL2C, PSMC4, PYGL, PYGM, RAE1, RBCK1, RPE, SAP30, SEH1L, SLC16A3, SLC25A12, SLC25A13, SPAG4, STC2, STMN1, TGFA, TGFB1, TIGAR, TPBG, TPI1, TPR, TPST1, TREH, VCAN, VEGFA, XYLT2 | <b>YES</b> |
| <b>LIHC</b> | <b>Normal 50<br/>Tumor 374</b> | AAAS, ABCB6, AC016586.1, ACO2, ADH1A, ADH1B, ADH1C, ADH4, ADH6, ADPGK, AGRN, ALDH1B1, ALDH2, ALDH9A1, ALDOA, ALDOB, ALG1, ANKZF1, ARNT, ARPP19, ARTN, AURKA, B3GALT6, B3GAT3, B3GNT3, B4GALT2, B4GALT4, B4GALT7, BIK, BPGM, BPNT1, CDK1, CENPA, CHPF2, CHST1, CHST12, CHST6, CLN6, COG2, COL5A1, COPB2, DDIT4, DEPDC1, DPYSL4, ECDEFNA3, EGLN3, EIF6, ENO1, ENO3, ERO1A, EXT2, FBP1, FKBP4, G6PC, G6PD, GAL3ST1, GALE, GALK1, GALK2, GAPDH, GFPT1, GLCE, GMPPA, GMPPB, GNPDA1, GNPDA2, GPC3, GPI, GYS1, HAX1, HDAC4, HDLBP, HK2, HK3, HKDC1, HMMR, HOMER1, HS2ST1, HSPA5, IDH3B, IDH3G, IDUA, KDELR3, KHK, KIF20A, KIF2A, MDH1, MDH2, ME1, ME2, MED24, MET, MIF, MIOX, MIR210, MLXIPL, MPL, NANP, NASP, NDC1, NDUFV3, NOL3, NSDHL, NUP107, NUP133, NUP153, NUP155, NUP160, NUP188, NUP205, NUP210, NUP214, NUP35, NUP37, NUP42, NUP43, NUP62, NUP85, NUP93, OGDH, OGT, P4HA2, PAM, PAXIP1, PCK1, PCK2, PFKFB2, PFKFB4, PFKL, PFKM, PGK1, PGLS, PGM1, PGP,                                                                                                                                                                                                                                                                   | <b>YES</b> |

|             |                                |                                                                                                                                                                                                                                                                                                                                                                                                                                                                                                                                                                                                                                                                                                                                                                                                                                                                                                                                                                                                                                                                                                                                                                                                                                                                                                                                                                                                                                                                                |            |
|-------------|--------------------------------|--------------------------------------------------------------------------------------------------------------------------------------------------------------------------------------------------------------------------------------------------------------------------------------------------------------------------------------------------------------------------------------------------------------------------------------------------------------------------------------------------------------------------------------------------------------------------------------------------------------------------------------------------------------------------------------------------------------------------------------------------------------------------------------------------------------------------------------------------------------------------------------------------------------------------------------------------------------------------------------------------------------------------------------------------------------------------------------------------------------------------------------------------------------------------------------------------------------------------------------------------------------------------------------------------------------------------------------------------------------------------------------------------------------------------------------------------------------------------------|------------|
|             |                                | PHKA2,PKM,PLOD1, POLR3K, POM121,POM121C,PPFIA4, PPIA, PPP2CA, PPP2R1A, PPP2R5D, PRKAA2, PRKAG1, PRPS1, PSMC4, PYGB, RAE1, RARS1, RBCK1, RPE, RRAGD, SAP30, SDC2, SDHC, SEC13, SLC16A3, SLC25A10, SLC25A12, SOX9,SPAG4, SRD5A3, STC1, STC2, STMN1, TALDO1, TGFBI, TIGAR, TP53, TPI1, TPR, TREH, TSTA3, TXN, VCAN,VEGFA,XYLT2, ZBTB7A, ZNF292                                                                                                                                                                                                                                                                                                                                                                                                                                                                                                                                                                                                                                                                                                                                                                                                                                                                                                                                                                                                                                                                                                                                    |            |
| <b>LUAD</b> | <b>Normal 59<br/>Tumor 533</b> | AAAS, ABCB6,ADORA2B,AGL,AGRN,AK4, AKR1A1,ALDH1B1, ALDH3B2, ALDH7A1, ALDOA, ALDOC,ALG1, ANKZF1,ARTN, AURKA, B3GALT6, B3GAT1,B3GAT3, B3GNT3, B4GALT1, B4GALT2, B4GALT4,B4GALT7,BIK,BPGM,BPNT1, CAPN5, CASP6, CDK1,CENPA, CHPF, CHPF2,CLDN3, CLDN9, COG2,COL5A1,COPB2, CTH,DDIT4,DEPDC1,DHTKD1, DLAT,DLDDSC2,ECD, EFNA3,EGLN3,EIF6, ELF3, ENO1,ENO2, ENO3, ENTPD5, ERO1A,FAM162A, FH, FKBP4,FUT8,G6PD, GAL3ST1, GALE, GALK1, GALM,GAPDH, GAPDHS, GCKR,GCLC, GFPT1, GLCE,GMPPA, GMPPB,GNPDA1,GOT1, GOT2,GPC1, GPI,GPR87, GUSB, GYS1, HAX1,HDLBP, HIF1A,HKDC1,HMMR,HS2ST1, HS6ST2, HSPA5, IDH1, IDH2, IDH3B, IDH3G, IDUA, IER3, IGFBP3, ISG20, KDEL3, KHK,KIF20A, KIF2A, LCT, LDHA, LDHB, LHPP, MDH1,MDH2, ME1, ME2, MET, MIF, MIOX, MIR210,MPI, NANP, NASP, NDC1, NDUFV3,NOL3, NSDHL,NT5E, NUP107, NUP133, NUP153, NUP155, NUP160,NUP188, NUP205, NUP210, NUP35, NUP37, NUP42, NUP43,NUP50, NUP54, NUP62, NUP85, NUP88, NUP93,OGTP4HA1, PAM, PAXIP1, PC, PDHA1, PDHB, PDK3,PFKFB1, PFKFB4, PFKL, PFKP, PGAM1, PGAM4, PGK1,PGK2, PGLS, PGM2, PGM2L1, PGP, PHKA2, PKM,PKP2,PLOD1,PLOD2, PMM2, POLR3K, POM121, POM121C,PPARA,PPFIA4,PPIA,PPP2R1A,PPP2R1B,PPP2R5D,PRKAA1, PRKAA2, PRKAG1, PRPS1, PSMC4, PYGB, PYGL,QSOX1, RAE1,RRS1, RBCK1, RPE, SAP30, SDC1,SDHA, SDHB, SDHC,SEC13, SEH1L, SLC16A3,SLC25A10, SLC25A12, SLC25A13, SLC35A3,SLC37A4,SOD1, SOX9, SPAG4, SRD5A3, STMN1, SUCLG1,TALDO1,TGFA, TIGAR, TP53, TPBG, TPI1, TPR,TPST1, TSTA3, TXN,UGP2, VCAN, VEGFA, XYLT2,ZNF292 | <b>YES</b> |
| <b>LUSC</b> | <b>Normal 49<br/>Tumor 502</b> | AAAS, ABCB6,ADH7,ADORA2B, AK4,ALDH3A1, ALDH3B2, ALDOA, ALDOC, ANKZF1, ARTN, AURKA, B3GAT3, B3GNT3, B4GALT2, B4GALT4, B4GALT7, BIK, CASP6, CDK1, CENPA, CHPF, CHPF2, CHST2, COL5A1, COPB2, DDIT4, DEPDC1, DHTKD1, DLD, DPYSL4, DSC2, EFNA3, EGFR, EGLN3, EIF6, ENO1, ENO2, ERO1A, EXT1,FAM162A, FH, FKBP4, FUT8,                                                                                                                                                                                                                                                                                                                                                                                                                                                                                                                                                                                                                                                                                                                                                                                                                                                                                                                                                                                                                                                                                                                                                                | <b>YES</b> |

|  |  |                                                                                                                                                                                                                                                                                                                                                                                                                                                                                                                                                                                                                                                                                                                                                                                                     |  |
|--|--|-----------------------------------------------------------------------------------------------------------------------------------------------------------------------------------------------------------------------------------------------------------------------------------------------------------------------------------------------------------------------------------------------------------------------------------------------------------------------------------------------------------------------------------------------------------------------------------------------------------------------------------------------------------------------------------------------------------------------------------------------------------------------------------------------------|--|
|  |  | G6PD, GAPDH, GCLC, GMPPA, GNPDA1, GOT1, GOT2, GPC1, GPI, GPR87, GYS1, HAX1, HIF1A, HK2, HMMR, HS6ST2, HSPA5, IDH1, IDH2, IGFBP3, KDELR3, KIF20A, KIF2A, LDHA, LDHB, LDHC, MDH1, MDH2, ME1, MIF, MIOX, MIR210, MPI, NANP, NASP, NDC1, NOL3, NSDHL, NUP107, NUP155, NUP205, NUP210, NUP35, NUP37, NUP42, NUP43, NUP50, NUP62, NUP85, NUP88, NUP93, OGDHL, P4HA1, PAXIP1, PC, PDK3, PFKFB1, PFKFB2, PFKFB3, PFKFB4, PFKP, PGAM1, PGAM4, PGK1, PGK2, PGM1, PGM2, PGM2L1, PKM, PKP2, PLOD1, PLOD2, PMM2, POLR3K, PPFIA4, PPIA, PPP2CA, PPP2CB, PRKACA, PRKACB, PRKACG, PSMC4, PYGL, PYGM, RAE1, RARS1, RPE, SAP30, SDC1, SDHA, SDHC, SEH1L, SLC16A3, SLC25A10, SLC25A12, SLC25A13, SLC37A4, SOD1, SOX9, SPAG4, SRD5A3, STC2, STMN1, TALDO1, TGFA, TP53, TPBG, TPI1, TPST1, TREH, TSTA3, TXN, VCAN, XYLT2 |  |
|--|--|-----------------------------------------------------------------------------------------------------------------------------------------------------------------------------------------------------------------------------------------------------------------------------------------------------------------------------------------------------------------------------------------------------------------------------------------------------------------------------------------------------------------------------------------------------------------------------------------------------------------------------------------------------------------------------------------------------------------------------------------------------------------------------------------------------|--|

**Table S2.** Multivariable Cox regression analysis of predictors of survival outcomes in the TCGA discovery cohort for 6 solid tumors.

| Cancer type | Gene    | Hazard Ratio | $\beta$ (Cox) | P value  |
|-------------|---------|--------------|---------------|----------|
| BLCA        | NUP188  | 1.598825     | 0.058158      | 0.002597 |
|             | CHPF    | 1.551001     | 0.549488      | 0.002997 |
|             | AK3     | 0.969007     | -0.314831     | 0.002906 |
| BRAC        | PGK1    | 1.266736     | 0.665145      | 0.001651 |
|             | SDC1    | 1.162645     | 0.162513      | 9.40E-05 |
|             | CHPF    | 1.490339     | 0.048914      | 0.000140 |
|             | NUP43   | 1.469928     | 0.059221      | 4.43E-05 |
| HNSC        | ALDH1B1 | 1.229825     | 0.227224      | 0.004188 |
|             | STC2    | 1.303147     | 0.298643      | 9.03E-06 |
|             | ALDH2   | 0.985525     | -0.145801     | 0.005879 |
|             | PGK1    | 1.247946     | 0.247639      | 4.03E-05 |
|             | PYGL    | 1.463654     | 0.462582      | 0.013119 |
|             | GPR87   | 1.585657     | 0.583949      | 0.004114 |
|             | KIF20A  | 1.128769     | 0.242487      | 1.37E-09 |
|             | AURKA   | 1.019880     | 0.012238      | 0.000375 |
| LIHC        | HMMR    | 1.121071     | 0.114007      | 1.01E-05 |
|             | STMN1   | 1.021461     | 0.091125      | 1.46E-05 |
|             | DEPDC1  | 1.229999     | 0.132254      | 8.40E-06 |
|             | PFKFB4  | 1.252219     | 0.156219      | 1.69E-05 |
|             | CENPA   | 1.176523     | 0.092026      | 1.40E-07 |
|             | CDK1    | 1.052063     | 0.053426      | 1.25E-06 |
|             | PPP2R1A | 1.116637     | 0.115962      | 4.26E-11 |
|             | RBCK1   | 1.104909     | 0.104363      | 0.010349 |
|             | SLC16A3 | 1.103470     | 0.102935      | 8.73E-05 |

|             |         |          |          |          |
|-------------|---------|----------|----------|----------|
| <b>LUAD</b> | FKBP4   | 1.814383 | 0.281108 | 4.50E-08 |
|             | ERO1A   | 1.547494 | 0.546001 | 1.67E-06 |
|             | PPIA    | 1.476700 | 0.475567 | 0.021940 |
|             | B4GALT1 | 1.353855 | 0.353231 | 0.013259 |
|             | LDHA    | 1.295509 | 0.295073 | 9.01E-07 |
| <b>LUSC</b> | PFKM    | 1.333626 | 0.133353 | 0.007008 |
|             | HMMR    | 1.431428 | 0.314246 | 0.018149 |
|             | TPST1   | 1.14307  | 0.143068 | 0.000486 |

**Table S3.** Clinicopathological characteristics of the HCC patients enrolled in the TCGA cohort.

| Clinicopathological Characteristics | Risk Score (OS) |                | $\chi^2$ | P value | Risk Score (RFS) |                | $\chi^2$ | P value |
|-------------------------------------|-----------------|----------------|----------|---------|------------------|----------------|----------|---------|
|                                     | High Risk n (%) | Low Risk n (%) |          |         | High Risk n (%)  | Low Risk n (%) |          |         |
| <b>Gender</b>                       |                 |                | 0.08769  | 0.7671  |                  |                | 0.0215   | 0.8832  |
| Male                                | 126(50.40%)     | 124(49.60%)    |          |         | 124(49.60%)      | 126(50.40%)    |          |         |
| Female                              | 59(48.76%)      | 62(51.24%)     |          |         | 61(50.41%)       | 60(49.59%)     |          |         |
| <b>Age</b>                          |                 |                | 2.818    | 0.0932  |                  |                | 1.560    | 0.2116  |
| ≤65                                 | 124(53.22%)     | 109(46.78%)    |          |         | 122(52.36%)      | 111(47.64%)    |          |         |
| >65                                 | 61(44.20%)      | 77(55.80%)     |          |         | 63(45.65%)       | 75(54.35%)     |          |         |
| <b>T</b>                            |                 |                | 13.77    | 0.0032  |                  |                | 11.46    | 0.0095  |
| T1                                  | 76(42.70%)      | 102(57.30%)    |          |         | 76(41.30%)       | 108(58.70%)    |          |         |
| T2                                  | 48(48.00%)      | 52(52.00%)     |          |         | 55(58.51%)       | 39(41.49%)     |          |         |
| T3                                  | 51(63.75%)      | 29(36.25)      |          |         | 45(56.25%)       | 35(43.75%)     |          |         |
| T4                                  | 10(76.92%)      | 3(23.08%)      |          |         | 9(69.23%)        | 4(30.77%)      |          |         |
| <b>Stage</b>                        |                 |                | 42.73    | <0.001  |                  |                | 13.74    | 0.0033  |
| I                                   | 66(37.93%)      | 108(62.07%)    |          |         | 78(41.71%)       | 109(58.29%)    |          |         |
| II                                  | 42(42.86%)      | 56(57.14%)     |          |         | 48(55.17%)       | 39(44.83%)     |          |         |
| III                                 | 68(78.16%)      | 19(21.84%)     |          |         | 51(57.96%)       | 37(42.05%)     |          |         |
| IV                                  | 9(75.00%)       | 3(25.00%)      |          |         | 8(88.89%)        | 1(11.11%)      |          |         |
| <b>Grade</b>                        |                 |                | 10.12    | 0.0175  |                  |                | 2.965    | 0.0851  |
| G1                                  | 16(35.56%)      | 29(64.44%)     |          |         | 40(56.34%)       | 31(43.66%)     |          |         |
| G2                                  | 77(47.83%)      | 84(52.17%)     |          |         | 43(31.85%)       | 92(68.15%)     |          |         |
| G3                                  | 80(53.33%)      | 70(46.67%)     |          |         | 91(64.54%)       | 50(35.46%)     |          |         |
| G4                                  | 12(80.00%)      | 3(20.00%)      |          |         | 11(45.83%)       | 13(54.17%)     |          |         |
| <b>Family Cancer History</b>        |                 |                | 0.00129  | 0.0359  |                  |                | 0.1665   | 0.6832  |
| NO                                  | 125(49.80%)     | 126(50.20%)    |          |         | 127(50.60%)      | 124(49.40%)    |          |         |
| YES                                 | 60(50.00%)      | 60(50.00%)     |          |         | 58(48.33%)       | 62(51.67%)     |          |         |
| <b>Hepatitis Virus Infection</b>    |                 |                | 2.481    | 0.4787  |                  |                | 2.104    | 0.5511  |
| None Risk                           | 91(46.67%)      | 104(53.33%)    |          |         | 103(52.82%)      | 92(47.18%)     |          |         |
| HBV                                 | 32(52.46%)      | 29(47.54%)     |          |         | 31(50.82%)       | 30(49.18%)     |          |         |
| HCV                                 | 8(44.44%)       | 10(55.56%)     |          |         | 8(44.44%)        | 10(55.56%)     |          |         |
| HCV&HBV                             | 54(55.67%)      | 43(44.33%)     |          |         | 43(44.33%)       | 54(55.67%)     |          |         |

|                         |             |             |       |        |            |             |       |        |
|-------------------------|-------------|-------------|-------|--------|------------|-------------|-------|--------|
| <b>Child Pugh Score</b> |             |             | 5.206 | 0.0741 |            |             | 3.480 | 0.1755 |
| A                       | 88(44.44%)  | 110(55.56%) |       |        | 90(45.46%) | 108(54.54%) |       |        |
| B                       | 54(54.55%)  | 45(45.45%)  |       |        | 53(53.54%) | 46(46.46%)  |       |        |
| C                       | 43(58.11%)  | 31(41.89%)  |       |        | 42(56.76%) | 32(43.24%)  |       |        |
| <b>BMI</b>              |             |             | 1.683 | 0.1946 |            |             |       |        |
| <=24                    | 93(53.45%)  | 81(46.55%)  |       |        | 93(53.45%) | 81(46.55%)  |       |        |
| >24                     | 92(46.70%)  | 105(53.30%) |       |        | 92(46.70%) | 105(53.30%) |       |        |
| <b>AFP</b>              |             |             | 5.952 | 0.0147 |            |             | 1.424 | 0.2328 |
| <=200                   | 83(43.68%)  | 107(56.32%) |       |        | 89(46.84%) | 101(53.18%) |       |        |
| >200                    | 102(56.35%) | 79(43.65%)  |       |        | 96(53.04%) | 85(46.96%)  |       |        |
| <b>Cancer Status</b>    |             |             | 16.64 | <0.001 |            |             |       |        |
| Tumor Free              | 98(41.88%)  | 136(58.12%) |       |        |            |             |       |        |
| With Tumor              | 72(65.45%)  | 38(34.55%)  |       |        |            |             |       |        |
| <b>Recurrence Event</b> |             |             | 76.91 | <0.001 |            |             |       |        |
| NO                      | 82(42.93%)  | 109(57.07%) |       |        |            |             |       |        |
| YES                     | 103(57.22%) | 77(42.78%)  |       |        |            |             |       |        |
| <b>Status</b>           |             |             |       |        |            |             |       |        |
| Alive                   | 90(37.34%)  | 151(62.66%) | 43.13 | <0.001 |            |             |       |        |
| Dead                    | 95(73.08)   | 35(26.92)   |       |        |            |             |       |        |

**Table S4.** Clinicopathological characteristics of the HCC patients enrolled in the GEO cohort.

| Clinicopathological Characteristics | Risk Score (OS) |                | $\chi^2$ | P value |
|-------------------------------------|-----------------|----------------|----------|---------|
|                                     | High Risk n (%) | Low Risk n (%) |          |         |
| <b>Gender</b>                       |                 |                | 2.553    | 0.1101  |
| Male                                | 91(47.64%)      | 100(52.36%)    |          |         |
| Female                              | 19(63.33%)      | 11(36.67%)     |          |         |
| <b>Age</b>                          |                 |                | 0.0430   | 0.8355  |
| ≤65                                 | 100(50.00%)     | 100(50.00%)    |          |         |
| >65                                 | 10(47.62%)      | 11(52.38%)     |          |         |
| <b>Stage</b>                        |                 |                | 39.37    | <0.001  |
| I                                   | 26(27.96%)      | 67(72.04%)     |          |         |
| II                                  | 43(55.13%)      | 35(44.87%)     |          |         |
| III                                 | 41(82.00%)      | 9(18.00%)      |          |         |
| <b>BCLC Staging</b>                 |                 |                | 28.23    | <0.001  |
| Zero                                | 9(42.86%)       | 12(57.14%)     |          |         |
| A                                   | 59(39.60%)      | 90(60.40%)     |          |         |
| B                                   | 18(81.82%)      | 4(18.18%)      |          |         |
| C                                   | 24(82.76%)      | 5(17.24%)      |          |         |
| <b>Child Pugh Score</b>             |                 |                | 26.43    | <0.001  |
| A                                   | 32(32.99%)      | 65(67.01%)     |          |         |
| B                                   | 40(53.33%)      | 35(46.67%)     |          |         |
| C                                   | 38(77.55%)      | 11(22.45%)     |          |         |
| <b>Cirrhosis</b>                    |                 |                | 3.792    | 0.0515  |

|                         |             |            |       |        |
|-------------------------|-------------|------------|-------|--------|
| NO                      | 5(27.78%)   | 13(72.22%) |       |        |
| YES                     | 105(51.72%) | 98(48.28%) |       |        |
| <b>Multi Nodular</b>    |             |            | 8.259 | 0.0041 |
| NO                      | 79(44.89%)  | 97(55.11%) |       |        |
| YES                     | 31(68.89%)  | 14(31.11%) |       |        |
| <b>Tumor Size</b>       |             |            | 12.54 | <0.001 |
| <=5                     | 57(40.71%)  | 83(59.29%) |       |        |
| >5                      | 53(65.43%)  | 28(34.57%) |       |        |
| <b>AFP</b>              |             |            | 14.79 | <0.001 |
| <=300                   | 46(38.02%)  | 75(61.98%) |       |        |
| >300                    | 64(64.00%)  | 36(36.00%) |       |        |
| <b>ALT</b>              |             |            | 1.655 | 0.1983 |
| <=50                    | 60(46.15%)  | 70(53.85%) |       |        |
| >50                     | 50(54.95%)  | 41(45.05%) |       |        |
| <b>Recurrence Event</b> |             |            | 23.08 | <0.001 |
| NO                      | 32(32.00%)  | 68(68.00%) |       |        |
| YES                     | 78(64.46%)  | 43(35.54%) |       |        |
| <b>Status</b>           |             |            | 54.48 | <0.001 |
| Alive                   | 41(30.15%)  | 95(69.85%) |       |        |
| Dead                    | 69(81.18%)  | 16(18.82%) |       |        |

**Table S5.** Clinicopathological characteristics of the HCC patients enrolled in the ICGC cohort.

| Clinicopathological Characteristics | Risk Score (OS) |                | $\chi^2$ | P value |
|-------------------------------------|-----------------|----------------|----------|---------|
|                                     | High Risk n (%) | Low Risk n (%) |          |         |
| <b>Gender</b>                       |                 |                | 2.691    | 0.1009  |
| Male                                | 80(46.78%)      | 91(53.22%)     |          |         |
| Female                              | 36(59.02%)      | 25(40.98%)     |          |         |
| <b>Age</b>                          |                 |                | 2.074    | 0.1498  |
| ≤65                                 | 35(42.17%)      | 48(57.83%)     |          |         |
| >65                                 | 74(52.11%)      | 68(47.89%)     |          |         |
| <b>Stage</b>                        |                 |                | 10.98    | 0.0118  |
| I                                   | 17(47.22%)      | 19(52.78%)     |          |         |
| II                                  | 46(43.40%)      | 60(56.60%)     |          |         |
| III                                 | 37(52.11%)      | 34(47.89%)     |          |         |
| IV                                  | 16(84.21%)      | 3(15.79%)      |          |         |
| <b>Grade</b>                        |                 |                | 28.20    | <0.001  |
| G1                                  | 6(27.27%)       | 16(72.78%)     |          |         |
| G2                                  | 56(41.55%)      | 83(58.45%)     |          |         |
| G3                                  | 42(71.19%)      | 17(28.81%)     |          |         |
| G4                                  | 9(100.00%)      | 0(0.00%)       |          |         |
| <b>Family Cancer History</b>        |                 |                | 0.6868   | 0.4072  |
| NO                                  | 79(51.97%)      | 73(48.03%)     |          |         |



|                         |            |             |        |        |
|-------------------------|------------|-------------|--------|--------|
| YES                     | 37(46.25%) | 43(53.75%)  |        |        |
| <b>Prior Malignancy</b> |            |             | 0.6125 | 0.4338 |
| NO                      | 99(49.01%) | 103(50.99%) |        |        |
| YES                     | 17(56.67%) | 13(43.33%)  |        |        |
| <b>Status</b>           |            |             | 27.43  | <0.001 |
| Alive                   | 79(41.80%) | 110(58.20%) |        |        |
| Dead                    | 37(86.05%) | 6(13.95%)   |        |        |

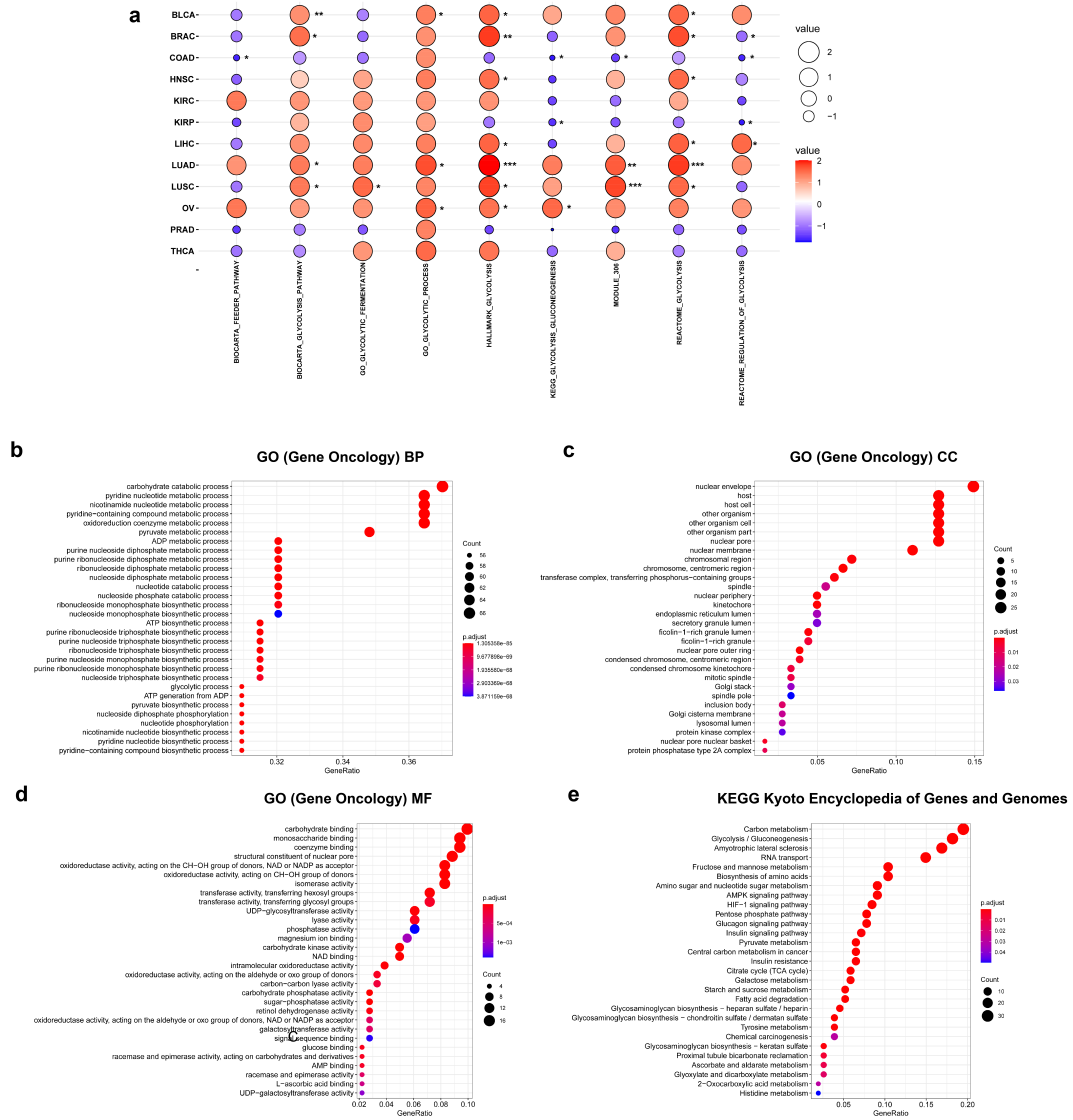

**Figure S1. a** Distribution of NES value and FDR q value in GSEA analysis results. **(b-e)** Gene Ontology (GO) enrichment analysis and KEGG pathways enriched core genes form GSEA results.

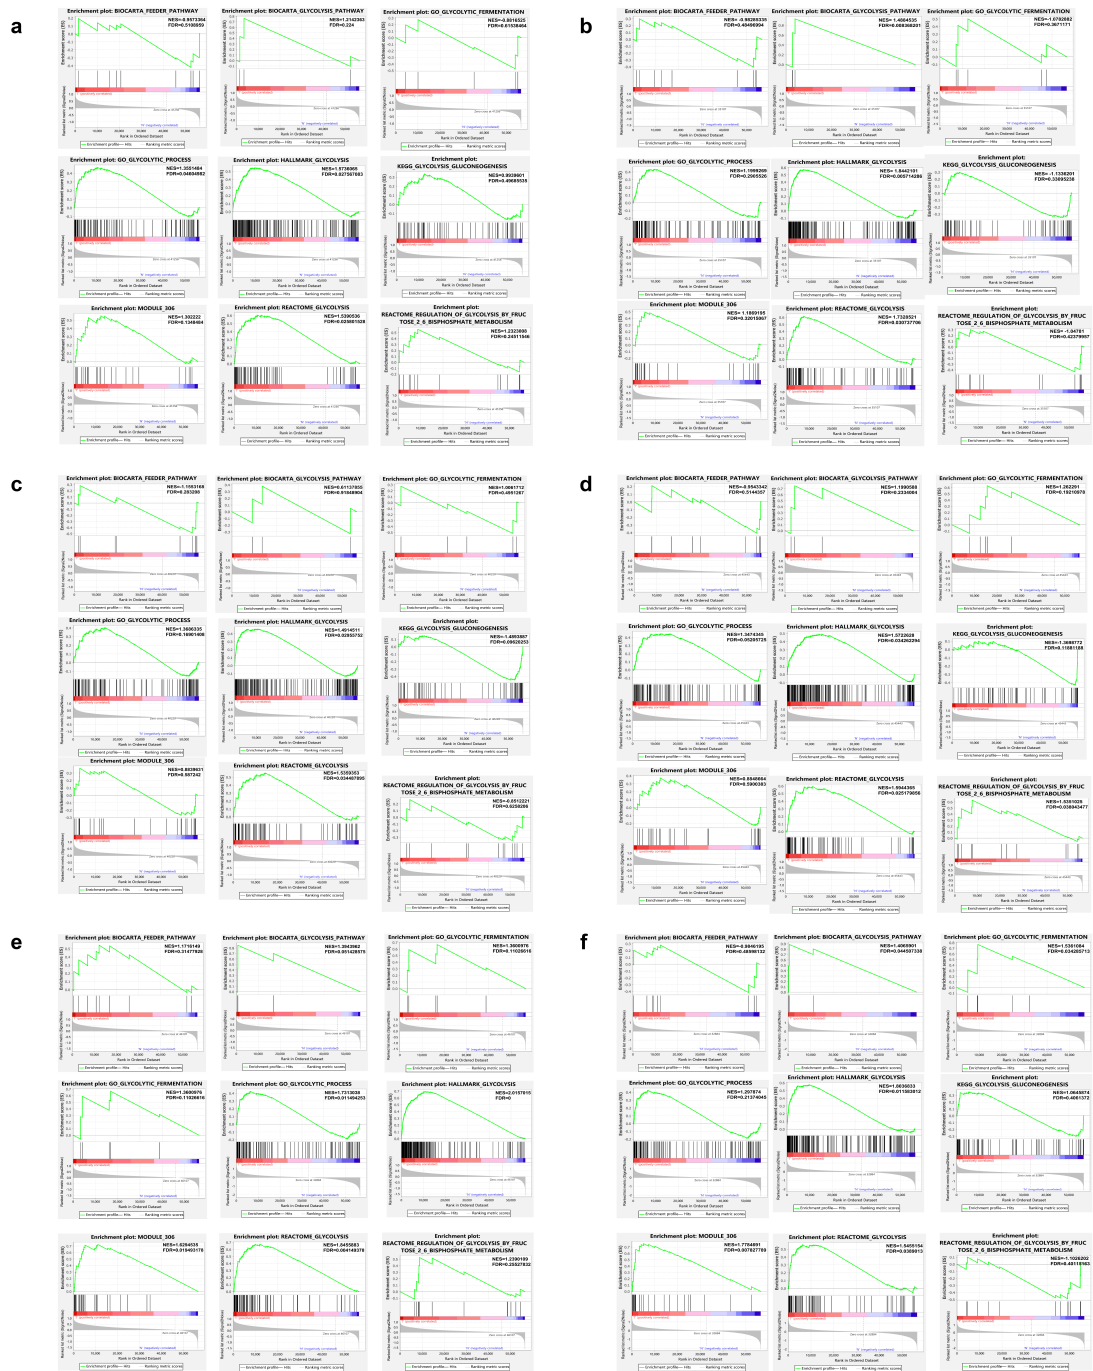

Figure S2. Detailed GSEA analyses in 6 solid tumors.

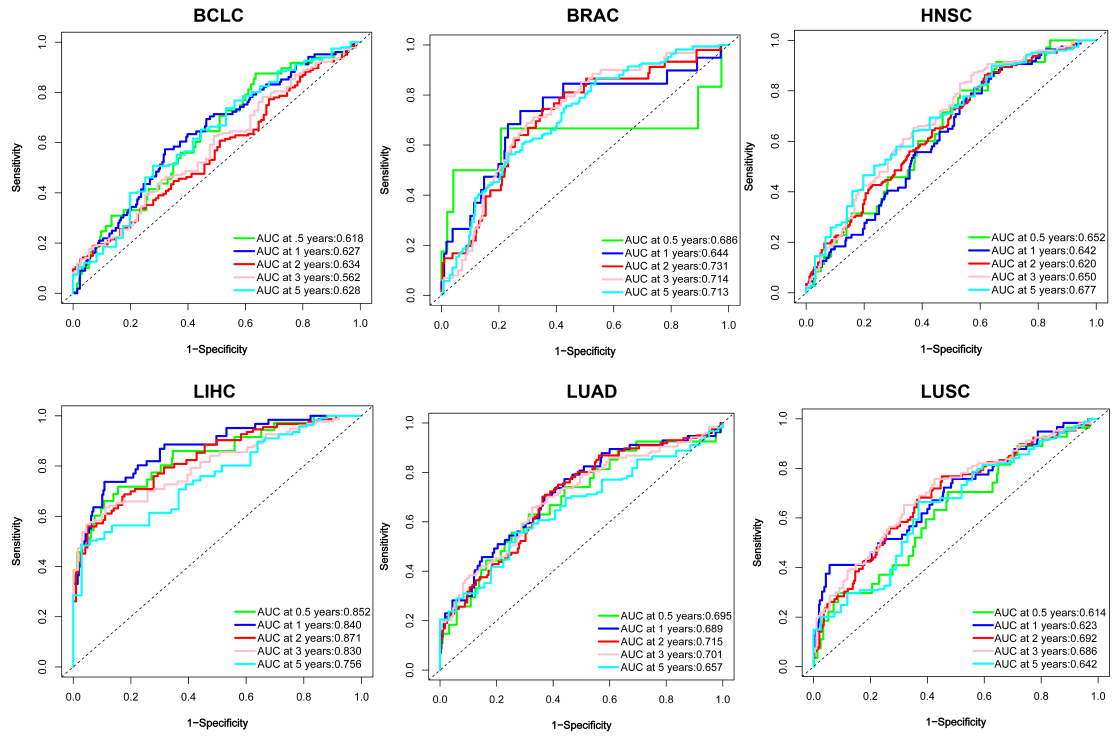

**Figure S3.** Performance of ROC curves in BLCA, BRCA, HNSC, LIHC, LUAD, and LUSC.

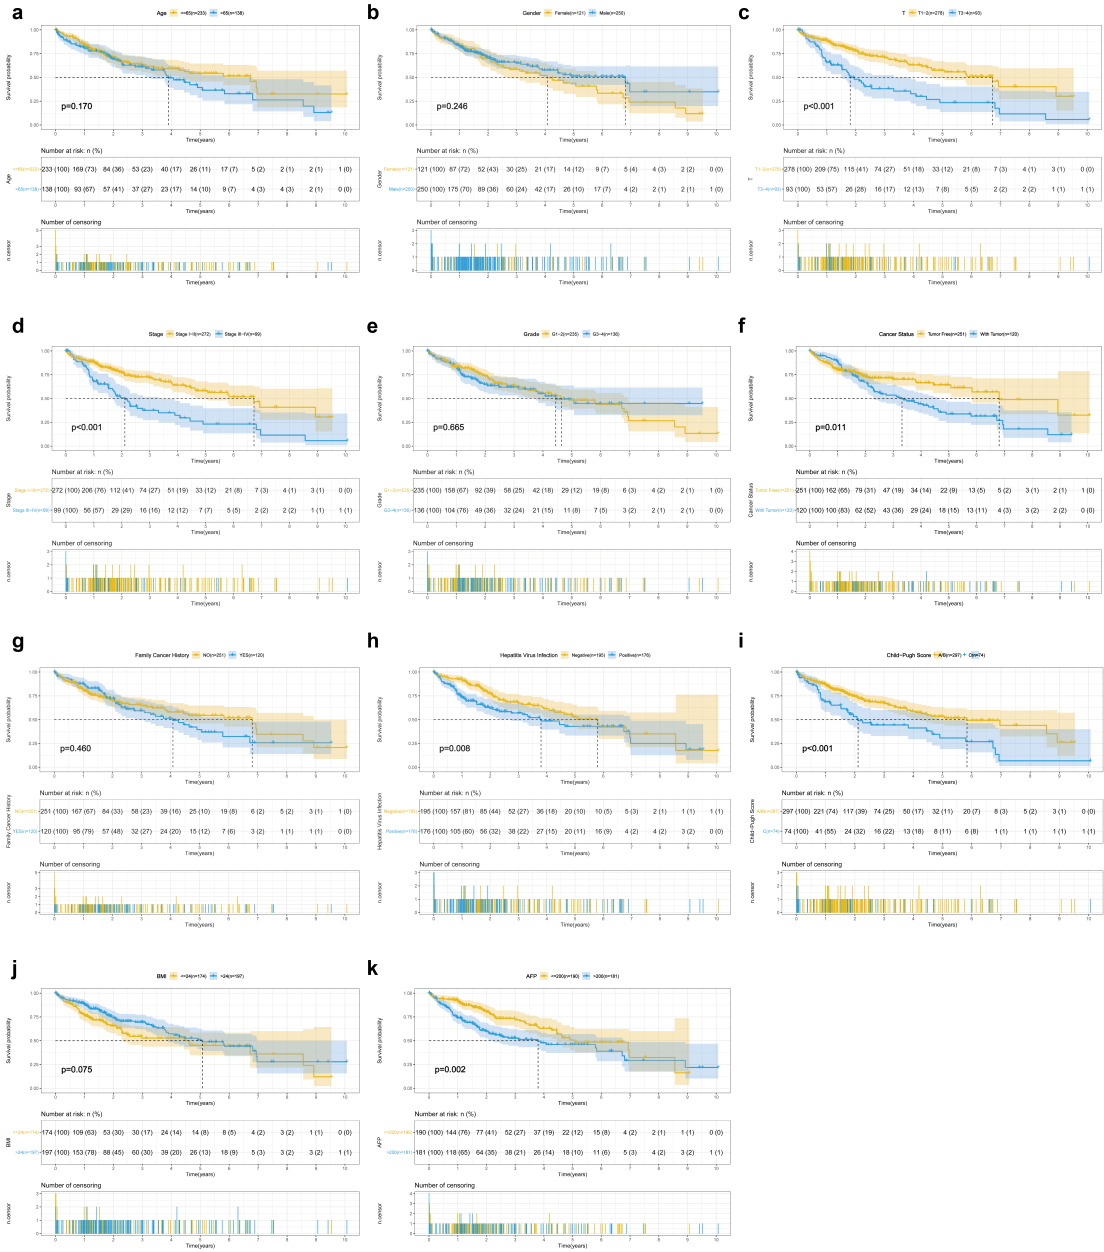

Figure S4. K-M survival analysis in different clinicopathological subgroups in the TCGA cohort.

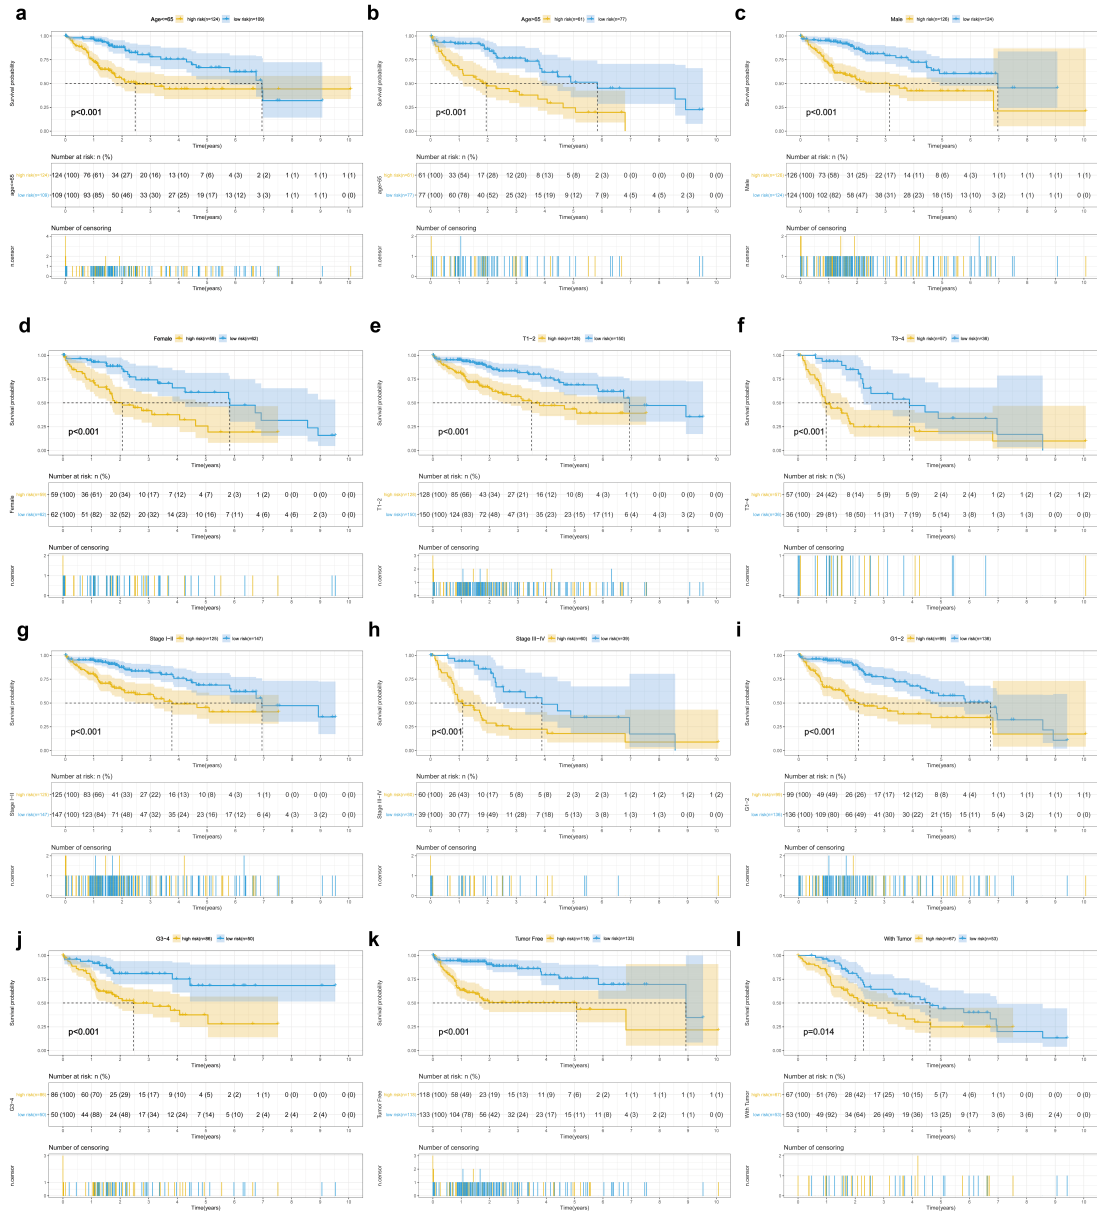

**Figure S5.** K-M analysis of patients stratified by age (**a, b**), gender (**c, d**), T classification (**e, f**), stage (**g, h**), grade (**i, j**), and tumor status (**k, l**) in TCGA cohort. Patients in the high-risk group achieved shorter overall survival.

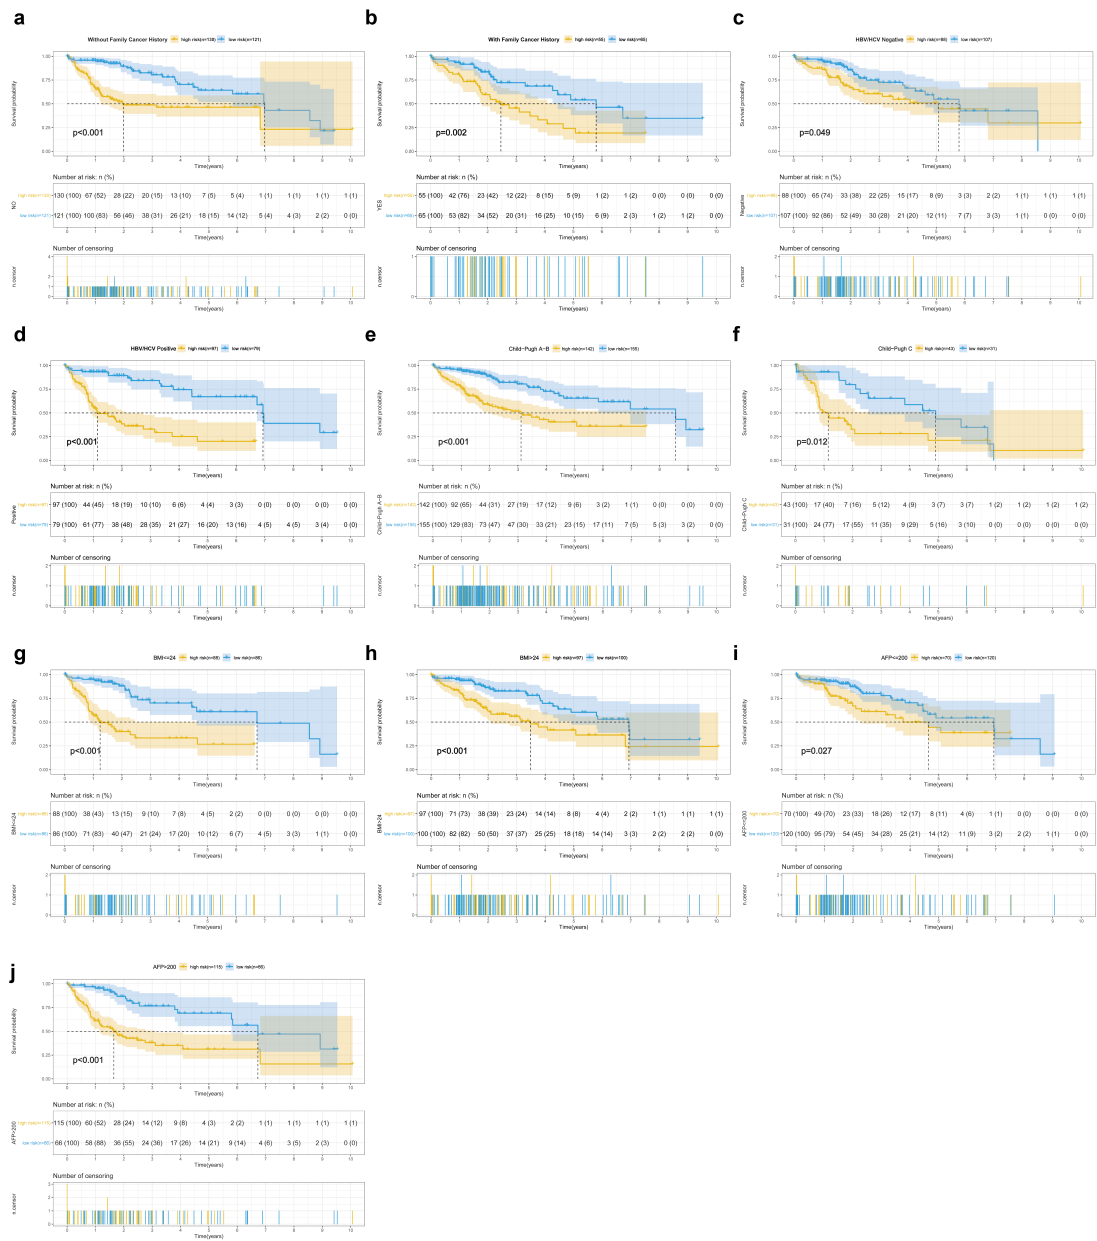

**Figure S6.** K-M analysis of patients stratified by family cancer history (**a, b**), hepatitis virus infection (**c, d**), Child-Pugh score (**e, f**), BMI (**g, h**), and AFP level (**i, j**) in TCGA cohort. Patients in the high-risk group achieved shorter overall survival.

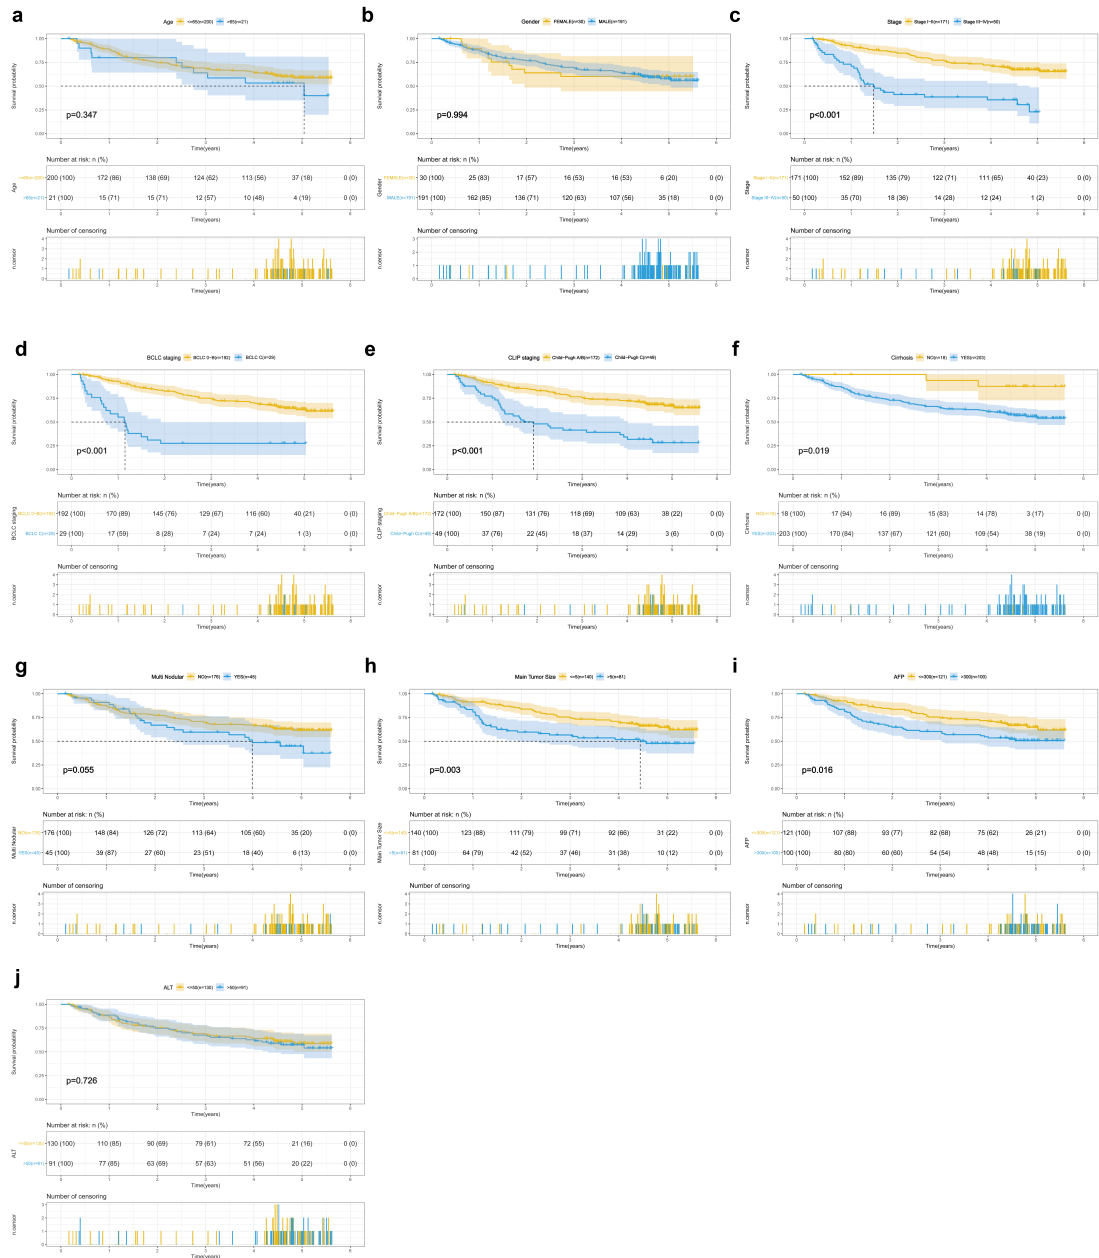

**Figure S7.** K-M survival analysis in different clinicopathological subgroups in the GEO cohort.

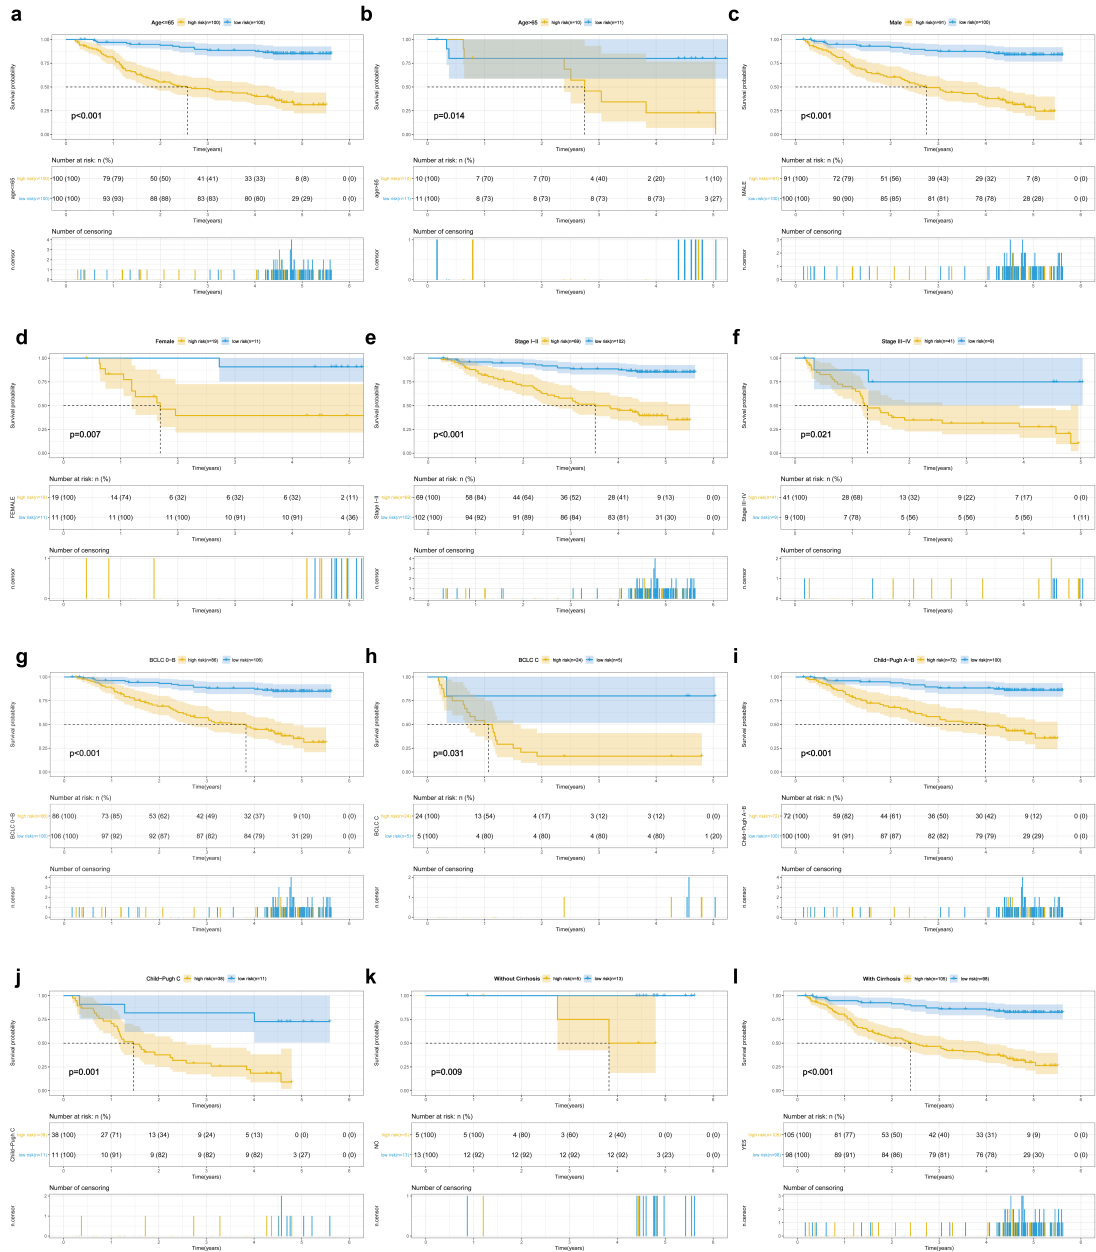

**Figure S8.** K-M analysis of patients stratified by Age (**a, b**), Gender (**c, d**), Stage (**e, f**), BCLC Staging (**g, h**), Child-Pugh Score (**i, j**), and Cirrhosis status (**k, l**) in GEO cohort. Patients in the high-risk group achieved shorter overall survival.



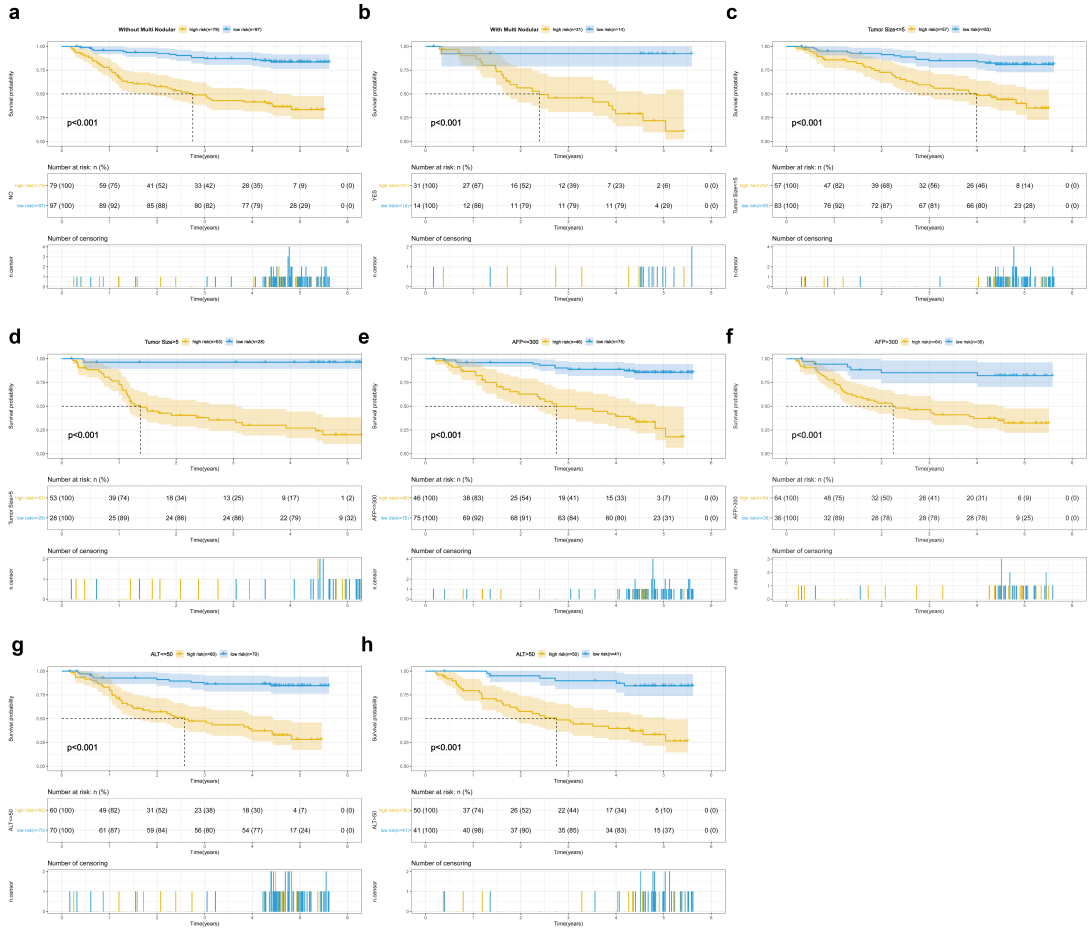

**Figure S9.** K-M analysis of patients stratified by Muti Nodular status (**a, b**), Tumor Size (**c, d**), AFP level (**e, f**), and ALT level (**g, h**) in GEO cohort. Patients in the high-risk group achieved shorter overall survival.

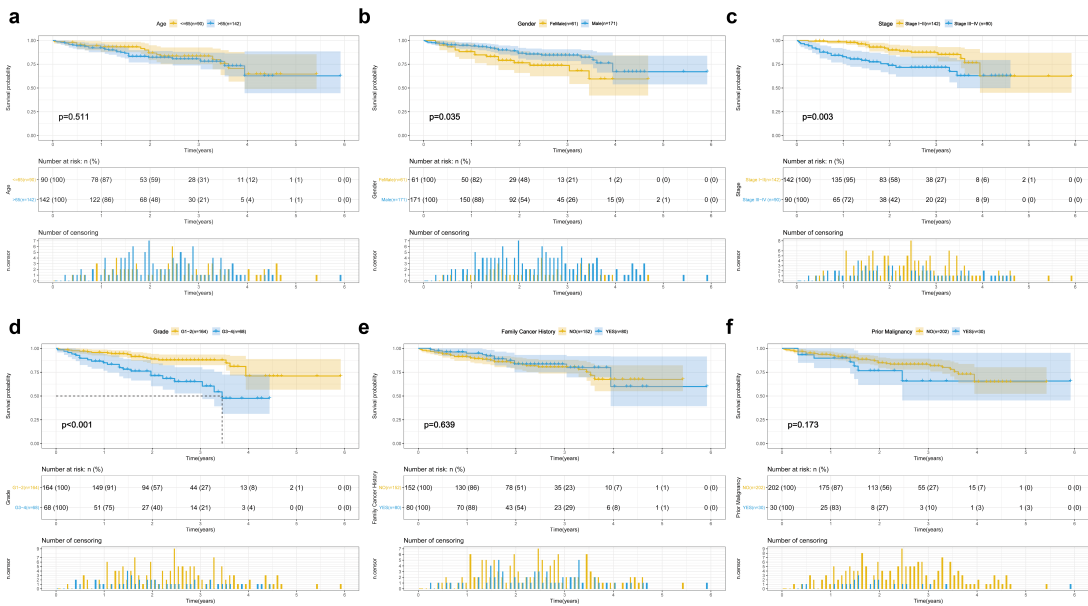

**Figure S10.** K-M survival analysis in different clinicopathological subgroups in the ICGC cohort.

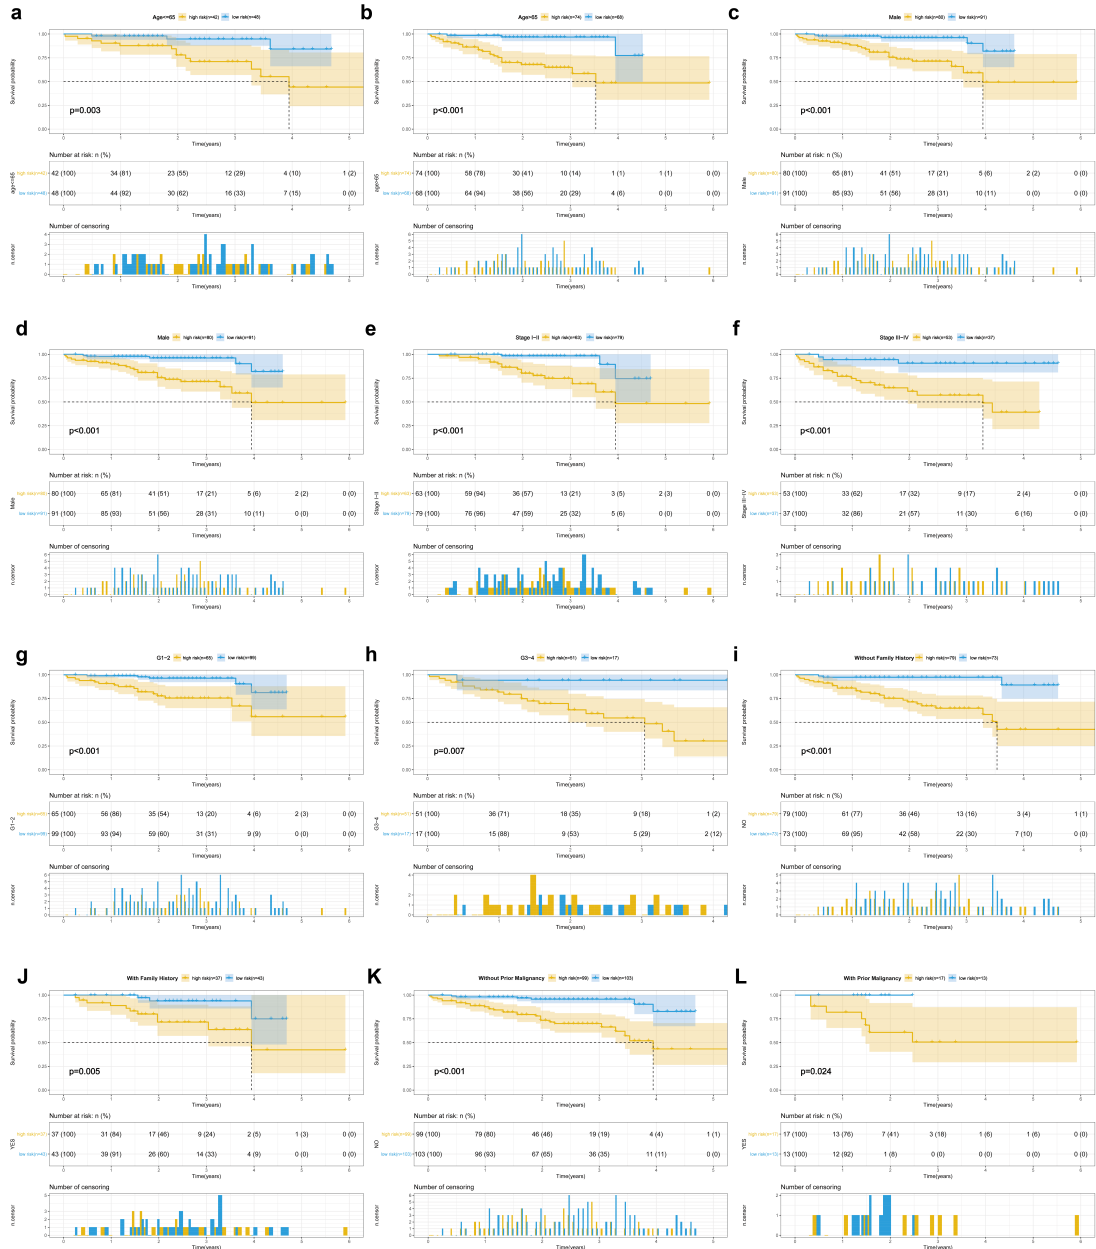

**Figure S11.** K-M analysis of patients stratified by Age (**a, b**), Gender (**c, d**), Stage (**e, f**), Grade (**g, h**), Family Cancer History (**i, j**), and Prior Malignancy (**k, l**) in GEO cohort. Patients in the high-risk group achieved shorter overall survival.

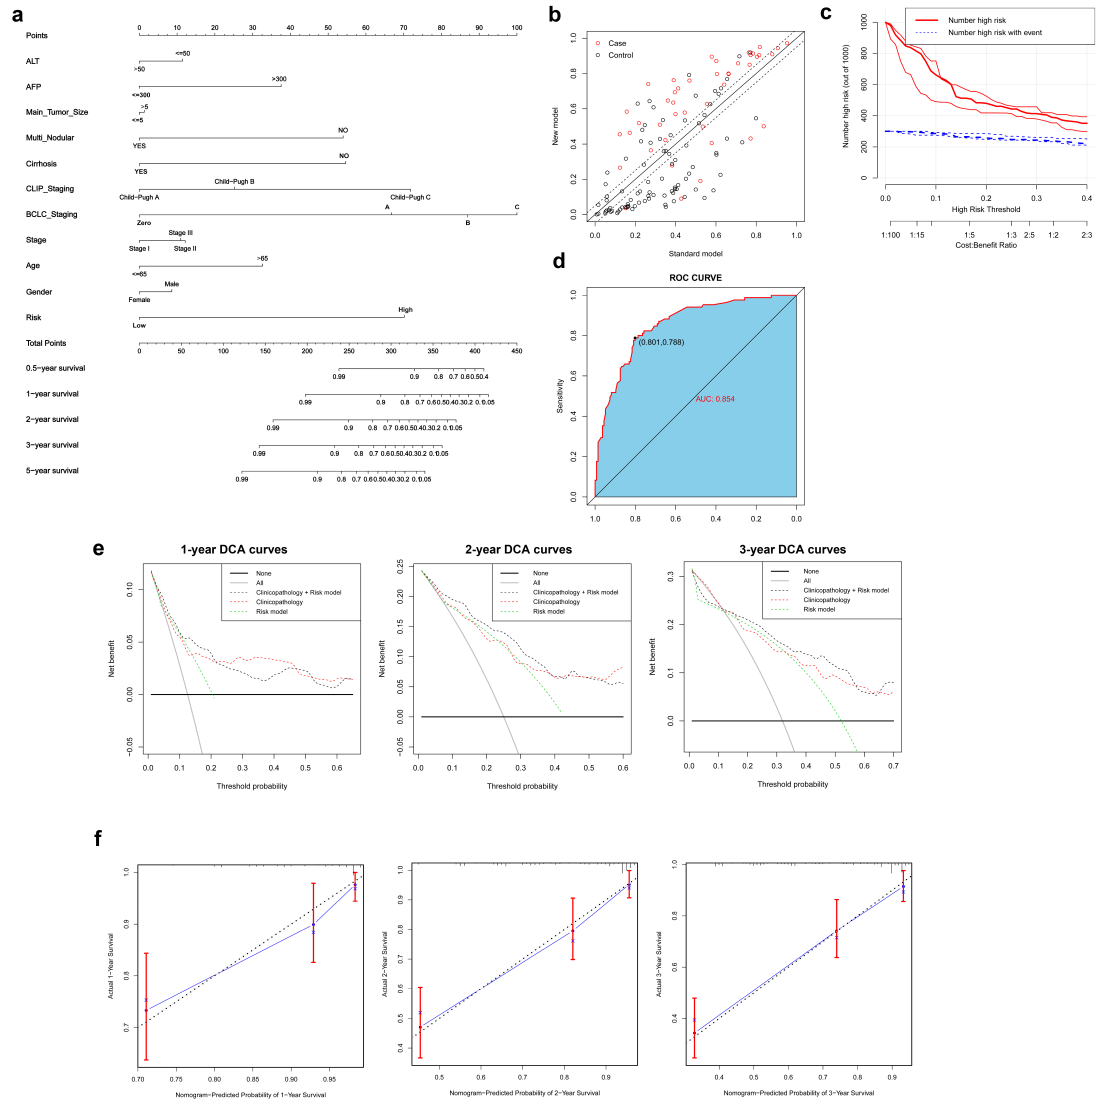

**Figure S12.** Performance of a nomogram integrated the GRGPI model and clinicopathological characteristics in the GEO cohort. A Nomograph for predicting overall survival probability of HCC patients. **(b-c)** The Nomogram model improves the identification of high-risk patients, and 221 HCC patients are reclassified between the standard model and the Nomogram model. **d** ROC curve for Nomogram model. **(e, f)** Decision curve and calibration curves analyses of Nomogram for 1-, 2-, and 3-year.

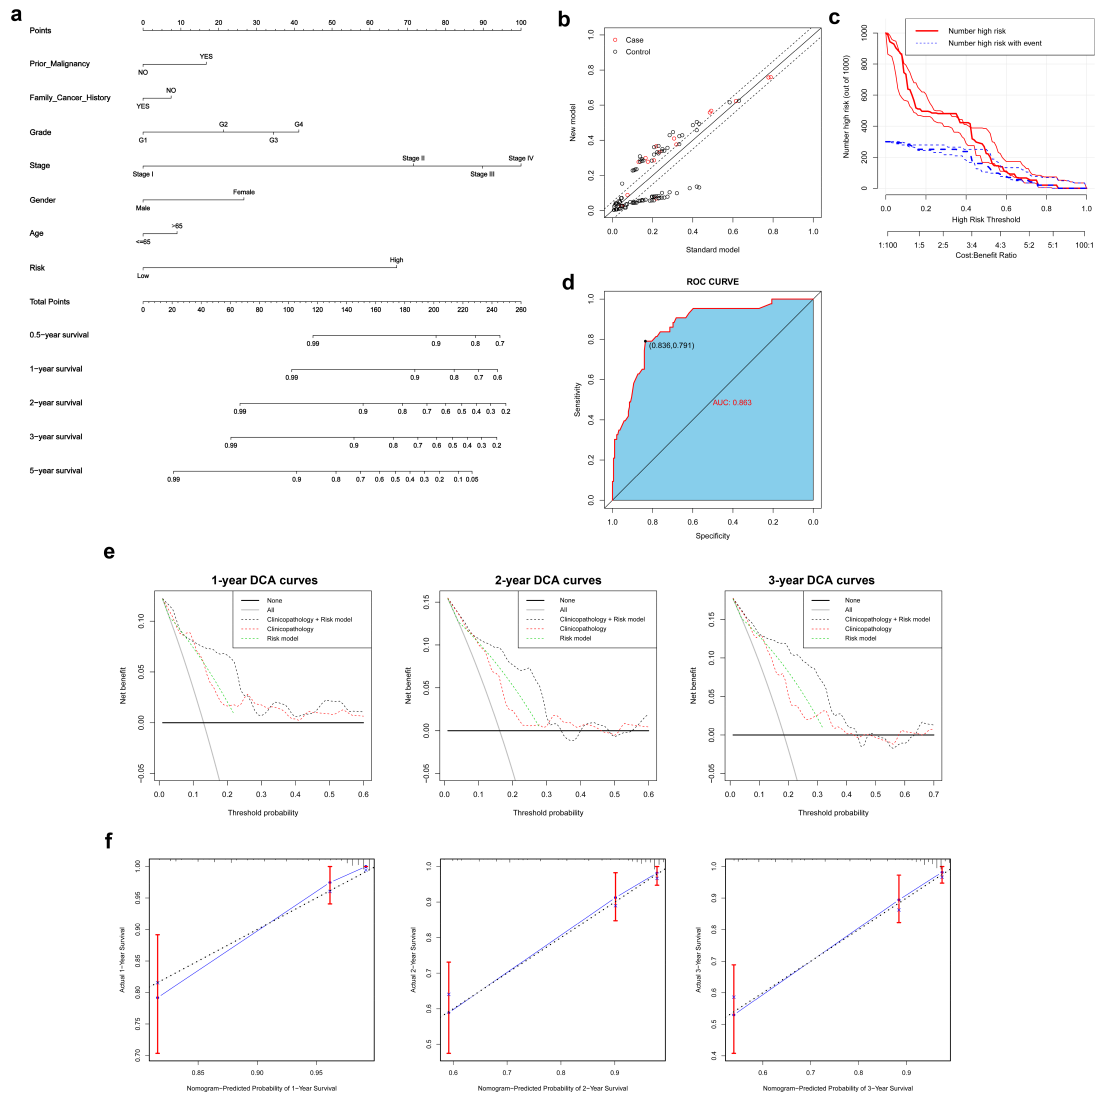

**Figure S13.** Performance of a nomogram integrated the GRGPI model and clinicopathological characteristics in the ICGC cohort. A Nomograph for predicting overall survival probability of HCC patients. **(b-c)** The Nomogram model improves the identification of high-risk patients, and 221 HCC patients are reclassified between the standard model and the Nomogram model. **d** ROC curve for Nomogram model. **(e, f)** Decision curve and calibration curves analyses of Nomogram for 1-, 2-, and 3-year.
